# Supplementary material for: Chemical and spectroscopic characterization of (Artemisinin/Querctin/ Zinc) novel mixed ligand complex with assessment of its potent high antiviral activity against SARS-CoV-2 and antioxidant capacity against toxicity induced by acrylamide in male rats
Source: PeerJ journal article supplement (doi:10.7717/peerj.15638), 2024-01-02
Supplement: raw1.pdf [file raw1.pdf]

```
DESCRIPTIVES VARIABLES=Groups ALT AST LDH IL6 TNF CRP
  /STATISTICS=MEAN STDDEV VARIANCE MIN MAX SEMEAN.
```

## Descriptives

[DataSet0]

**Descriptive Statistics**

|                    | N         | Minimum   | Maximum   | Mean      |            | Std. Deviation | Variance  |
|--------------------|-----------|-----------|-----------|-----------|------------|----------------|-----------|
|                    | Statistic | Statistic | Statistic | Statistic | Std. Error | Statistic      | Statistic |
| Groups             | 20        | 1.00      | 4.00      | 2.5000    | .25649     | 1.14708        | 1.316     |
| ALT                | 20        | 13.02     | 184.91    | 59.4200   | 16.66537   | 74.52980       | 5.555E3   |
| AST                | 20        | 14.00     | 294.53    | 86.6935   | 27.54274   | 123.17488      | 1.517E4   |
| LDH                | 20        | 140.43    | 545.43    | 2.5670E2  | 38.61683   | 172.69973      | 2.983E4   |
| IL6                | 20        | 3.39      | 49.71     | 15.8380   | 4.49326    | 20.09445       | 403.787   |
| TNF                | 20        | 3.79      | 62.77     | 20.4435   | 5.63851    | 25.21618       | 635.856   |
| CRP                | 19        | 2.22      | 96.11     | 23.6453   | 8.82588    | 38.47112       | 1.480E3   |
| Valid N (listwise) | 19        |           |           |           |            |                |           |

```
ONEWAY ALT AST LDH IL6 TNF CRP BY Groups
  /STATISTICS DESCRIPTIVES HOMOGENEITY
  /MISSING ANALYSIS
  /POSTHOC=BTUKEY DUNCAN LSD ALPHA(0.05).
```

## Oneway

[DataSet0]

**Descriptives**

|     | N              | Mean | Std. Deviation | Std. Error | 95% Confidence Interval for Mean |             |          |
|-----|----------------|------|----------------|------------|----------------------------------|-------------|----------|
|     |                |      |                |            | Lower Bound                      | Upper Bound |          |
| ALT | Control group  | 5    | 13.1140        | .05273     | .02358                           | 13.0485     | 13.1795  |
|     | Acy            | 5    | 1.8489E2       | .01871     | .00837                           | 184.8668    | 184.9132 |
|     | Art/Q/Zn       | 5    | 13.2280        | .01483     | .00663                           | 13.2096     | 13.2464  |
|     | Acy + Art/Q/Zn | 5    | 26.4480        | .03271     | .01463                           | 26.4074     | 26.4886  |
|     | Total          | 20   | 59.4200        | 74.52980   | 16.66537                         | 24.5390     | 94.3010  |
| AST | Control group  | 5    | 14.1160        | .06656     | .02977                           | 14.0334     | 14.1986  |
|     | Acy            | 5    | 2.9452E2       | .01140     | .00510                           | 294.5018    | 294.5302 |
|     | Art/Q/Zn       | 5    | 14.0460        | .02702     | .01208                           | 14.0125     | 14.0795  |
|     | Acy + Art/Q/Zn | 5    | 24.0960        | .01140     | .00510                           | 24.0818     | 24.1102  |
|     | Total          | 20   | 86.6935        | 123.17488  | 27.54274                         | 29.0459     | 144.3411 |
| LDH | Control group  | 5    | 1.4051E2       | .13278     | .05938                           | 140.3491    | 140.6789 |
|     | Acy            | 5    | 5.4541E2       | .01304     | .00583                           | 545.3918    | 545.4242 |
|     | Art/Q/Zn       | 5    | 1.4212E2       | .12696     | .05678                           | 141.9604    | 142.2756 |
|     | Acy + Art/Q/Zn | 5    | 1.9878E2       | .07893     | .03530                           | 198.6780    | 198.8740 |
|     | Total          | 20   | 2.5670E2       | 172.69973  | 38.61683                         | 175.8780    | 337.5300 |
| IL6 | Control group  | 5    | 3.4080         | .01643     | .00735                           | 3.3876      | 3.4284   |
|     | Acy            | 5    | 49.7020        | .00837     | .00374                           | 49.6916     | 49.7124  |
|     | Art/Q/Zn       | 5    | 3.8160         | .01140     | .00510                           | 3.8018      | 3.8302   |
|     | Acy + Art/Q/Zn | 5    | 6.4260         | .01140     | .00510                           | 6.4118      | 6.4402   |
|     | Total          | 20   | 15.8380        | 20.09445   | 4.49326                          | 6.4335      | 25.2425  |
| TNF | Control group  | 5    | 4.4740         | .00548     | .00245                           | 4.4672      | 4.4808   |
|     | Acy            | 5    | 62.7540        | .00894     | .00400                           | 62.7429     | 62.7651  |
|     | Art/Q/Zn       | 5    | 3.8000         | .00707     | .00316                           | 3.7912      | 3.8088   |
|     | Acy + Art/Q/Zn | 5    | 10.7460        | .01817     | .00812                           | 10.7234     | 10.7686  |
|     | Total          | 20   | 20.4435        | 25.21618   | 5.63851                          | 8.6420      | 32.2450  |
| CRP | Control group  | 5    | 2.2340         | .00894     | .00400                           | 2.2229      | 2.2451   |
|     | Acy            | 5    | 96.0960        | .01140     | .00510                           | 96.0818     | 96.1102  |
|     | Art/Q/Zn       | 5    | 4.2340         | .00894     | .00400                           | 4.2229      | 4.2451   |
|     | Acy + Art/Q/Zn | 5    | 6.5080         | .00837     | .00374                           | 6.4976      | 6.5184   |
|     | Total          | 20   | 27.2680        | 40.79970   | 9.12309                          | 8.1732      | 46.3628  |

**Descriptives**

|     |                | Minimum | Maximum |
|-----|----------------|---------|---------|
| ALT | Control group  | 13.02   | 13.14   |
|     | Acy            | 184.87  | 184.91  |
|     | Art/Q/Zn       | 13.21   | 13.25   |
|     | Acy + Art/Q/Zn | 26.40   | 26.49   |
|     | Total          | 13.02   | 184.91  |
| AST | Control group  | 14.00   | 14.16   |
|     | Acy            | 294.50  | 294.53  |
|     | Art/Q/Zn       | 14.00   | 14.07   |
|     | Acy + Art/Q/Zn | 24.08   | 24.11   |
|     | Total          | 14.00   | 294.53  |
| LDH | Control group  | 140.43  | 140.75  |
|     | Acy            | 545.40  | 545.43  |
|     | Art/Q/Zn       | 142.00  | 142.32  |
|     | Acy + Art/Q/Zn | 198.65  | 198.86  |
|     | Total          | 140.43  | 545.43  |
| IL6 | Control group  | 3.39    | 3.43    |
|     | Acy            | 49.69   | 49.71   |
|     | Art/Q/Zn       | 3.80    | 3.83    |
|     | Acy + Art/Q/Zn | 6.41    | 6.44    |
|     | Total          | 3.39    | 49.71   |
| TNF | Control group  | 4.47    | 4.48    |
|     | Acy            | 62.75   | 62.77   |
|     | Art/Q/Zn       | 3.79    | 3.81    |
|     | Acy + Art/Q/Zn | 10.72   | 10.77   |
|     | Total          | 3.79    | 62.77   |
| CRP | Control group  | 2.22    | 2.24    |
|     | Acy            | 96.08   | 96.11   |
|     | Art/Q/Zn       | 4.22    | 4.24    |
|     | Acy + Art/Q/Zn | 6.50    | 6.52    |
|     | Total          | 2.22    | 96.11   |

**Test of Homogeneity of Variances**

|     | Levene Statistic | df1 | df2 | Sig. |
|-----|------------------|-----|-----|------|
| ALT | 1.755            | 3   | 16  | .196 |
| AST | 2.995            | 3   | 16  | .062 |
| LDH | 1.896            | 3   | 16  | .171 |
| IL6 | 1.471            | 3   | 16  | .260 |

### Test of Homogeneity of Variances

|     | Levene Statistic | df1 | df2 | Sig. |
|-----|------------------|-----|-----|------|
| TNF | 1.722            | 3   | 16  | .203 |
| CRP | .246             | 3   | 16  | .863 |

### ANOVA

|     |                | Sum of Squares | df | Mean Square | F       | Sig. |
|-----|----------------|----------------|----|-------------|---------|------|
| ALT | Between Groups | 105539.101     | 3  | 35179.700   | 3.184E7 | .000 |
|     | Within Groups  | .018           | 16 | .001        |         |      |
|     | Total          | 105539.119     | 19 |             |         |      |
| AST | Between Groups | 288268.956     | 3  | 96089.652   | 7.091E7 | .000 |
|     | Within Groups  | .022           | 16 | .001        |         |      |
|     | Total          | 288268.978     | 19 |             |         |      |
| LDH | Between Groups | 566678.601     | 3  | 188892.867  | 1.882E7 | .000 |
|     | Within Groups  | .161           | 16 | .010        |         |      |
|     | Total          | 566678.762     | 19 |             |         |      |
| IL6 | Between Groups | 7671.948       | 3  | 2557.316    | 1.705E7 | .000 |
|     | Within Groups  | .002           | 16 | .000        |         |      |
|     | Total          | 7671.951       | 19 |             |         |      |
| TNF | Between Groups | 12081.255      | 3  | 4027.085    | 3.287E7 | .000 |
|     | Within Groups  | .002           | 16 | .000        |         |      |
|     | Total          | 12081.257      | 19 |             |         |      |
| CRP | Between Groups | 31627.687      | 3  | 10542.562   | 1.171E8 | .000 |
|     | Within Groups  | .001           | 16 | .000        |         |      |
|     | Total          | 31627.689      | 19 |             |         |      |

### Post Hoc Tests

#### Multiple Comparisons

| Dependent Variable | (I) Groups | (J) Groups    | Mean Difference (I-J) | Std. Error  | Sig.   | 95% Confidence Interval |             |            |
|--------------------|------------|---------------|-----------------------|-------------|--------|-------------------------|-------------|------------|
|                    |            |               |                       |             |        | Lower Bound             | Upper Bound |            |
| ALT                | LSD        | Control group | Acy                   | -171.77600* | .02102 | .000                    | -171.8206-  | -171.7314- |
|                    |            |               | Art/Q/Zn              | -.11400*    | .02102 | .000                    | -.1586-     | -.0694-    |
|                    |            |               | Acy + Art/Q/Zn        | -13.33400*  | .02102 | .000                    | -13.3786-   | -13.2894-  |
|                    | Acy        | Control group | Acy                   | 171.77600*  | .02102 | .000                    | 171.7314    | 171.8206   |
|                    |            |               | Art/Q/Zn              | 171.66200*  | .02102 | .000                    | 171.6174    | 171.7066   |
|                    |            |               | Acy + Art/Q/Zn        | 158.44200*  | .02102 | .000                    | 158.3974    | 158.4866   |

\*. The mean difference is significant at the 0.05 level.

**Multiple Comparisons**

| Dependent Variable | (I) Groups     | (J) Groups    | Mean Difference (I-J) | Std. Error     | Sig.        | 95% Confidence Interval |             |            |            |
|--------------------|----------------|---------------|-----------------------|----------------|-------------|-------------------------|-------------|------------|------------|
|                    |                |               |                       |                |             | Lower Bound             | Upper Bound |            |            |
| ALT                | LSD            | Art/Q/Zn      | Control group         | .11400*        | .02102      | .000                    | .0694       | .1586      |            |
|                    |                |               | Acy                   | -171.66200*    | .02102      | .000                    | -171.7066-  | -171.6174- |            |
|                    |                |               | Acy + Art/Q/Zn        | -13.22000*     | .02102      | .000                    | -13.2646-   | -13.1754-  |            |
|                    | Acy + Art/Q/Zn | Control group | Acy                   | 13.33400*      | .02102      | .000                    | 13.2894     | 13.3786    |            |
|                    |                |               | Acy                   | -158.44200*    | .02102      | .000                    | -158.4866-  | -158.3974- |            |
|                    |                |               | Art/Q/Zn              | 13.22000*      | .02102      | .000                    | 13.1754     | 13.2646    |            |
|                    | AST            | LSD           | Control group         | Acy            | -280.40000* | .02328                  | .000        | -280.4494- | -280.3506- |
|                    |                |               |                       | Art/Q/Zn       | .07000*     | .02328                  | .008        | .0206      | .1194      |
|                    |                |               |                       | Acy + Art/Q/Zn | -9.98000*   | .02328                  | .000        | -10.0294-  | -9.9306-   |
| Acy                |                |               | Control group         | Acy            | 280.40000*  | .02328                  | .000        | 280.3506   | 280.4494   |
|                    |                |               |                       | Art/Q/Zn       | 280.47000*  | .02328                  | .000        | 280.4206   | 280.5194   |
|                    |                |               |                       | Acy + Art/Q/Zn | 270.42000*  | .02328                  | .000        | 270.3706   | 270.4694   |
| Art/Q/Zn           |                |               | Control group         | Acy            | -.07000*    | .02328                  | .008        | -.1194-    | -.0206-    |
|                    |                |               |                       | Acy            | -280.47000* | .02328                  | .000        | -280.5194- | -280.4206- |
|                    |                |               |                       | Acy + Art/Q/Zn | -10.05000*  | .02328                  | .000        | -10.0994-  | -10.0006-  |
| Acy + Art/Q/Zn     |                | Control group | Acy                   | 9.98000*       | .02328      | .000                    | 9.9306      | 10.0294    |            |
|                    |                |               | Acy                   | -270.42000*    | .02328      | .000                    | -270.4694-  | -270.3706- |            |
|                    |                |               | Art/Q/Zn              | 10.05000*      | .02328      | .000                    | 10.0006     | 10.0994    |            |
| LDH                |                | LSD           | Control group         | Acy            | -404.89400* | .06336                  | .000        | -405.0283- | -404.7597- |
|                    |                |               |                       | Art/Q/Zn       | -1.60400*   | .06336                  | .000        | -1.7383-   | -1.4697-   |
|                    |                |               |                       | Acy + Art/Q/Zn | -58.26200*  | .06336                  | .000        | -58.3963-  | -58.1277-  |
|                    | Acy            |               | Control group         | Acy            | 404.89400*  | .06336                  | .000        | 404.7597   | 405.0283   |
|                    |                |               |                       | Art/Q/Zn       | 403.29000*  | .06336                  | .000        | 403.1557   | 403.4243   |
|                    |                |               |                       | Acy + Art/Q/Zn | 346.63200*  | .06336                  | .000        | 346.4977   | 346.7663   |
|                    | Art/Q/Zn       |               | Control group         | Acy            | 1.60400*    | .06336                  | .000        | 1.4697     | 1.7383     |
|                    |                |               |                       | Acy            | -403.29000* | .06336                  | .000        | -403.4243- | -403.1557- |
|                    |                |               |                       | Acy + Art/Q/Zn | -56.65800*  | .06336                  | .000        | -56.7923-  | -56.5237-  |
|                    | Acy + Art/Q/Zn | Control group | Acy                   | 58.26200*      | .06336      | .000                    | 58.1277     | 58.3963    |            |
|                    |                |               | Acy                   | -346.63200*    | .06336      | .000                    | -346.7663-  | -346.4977- |            |
|                    |                |               | Art/Q/Zn              | 56.65800*      | .06336      | .000                    | 56.5237     | 56.7923    |            |
|                    | IL6            | LSD           | Control group         | Acy            | -46.29400*  | .00775                  | .000        | -46.3104-  | -46.2776-  |
|                    |                |               |                       | Art/Q/Zn       | -.40800*    | .00775                  | .000        | -.4244-    | -.3916-    |
|                    |                |               |                       | Acy + Art/Q/Zn | -3.01800*   | .00775                  | .000        | -3.0344-   | -3.0016-   |
| Acy                |                |               | Control group         | Acy            | 46.29400*   | .00775                  | .000        | 46.2776    | 46.3104    |
|                    |                |               |                       | Art/Q/Zn       | 45.88600*   | .00775                  | .000        | 45.8696    | 45.9024    |
|                    |                |               |                       | Acy + Art/Q/Zn | 43.27600*   | .00775                  | .000        | 43.2596    | 43.2924    |
| Art/Q/Zn           |                |               | Control group         | Acy            | .40800*     | .00775                  | .000        | .3916      | .4244      |
|                    |                |               |                       | Acy            | -45.88600*  | .00775                  | .000        | -45.9024-  | -45.8696-  |
|                    |                |               |                       | Acy + Art/Q/Zn | -2.61000*   | .00775                  | .000        | -2.6264-   | -2.5936-   |

\*. The mean difference is significant at the 0.05 level.

**Multiple Comparisons**

| Dependent Variable | (I) Groups | (J) Groups     | Mean Difference (I-J) | Std. Error | Sig.   | 95% Confidence Interval |             |           |
|--------------------|------------|----------------|-----------------------|------------|--------|-------------------------|-------------|-----------|
|                    |            |                |                       |            |        | Lower Bound             | Upper Bound |           |
| IL6                | LSD        | Acy + Art/Q/Zn | Control group         | 3.01800*   | .00775 | .000                    | 3.0016      | 3.0344    |
|                    |            |                | Acy                   | -43.27600* | .00775 | .000                    | -43.2924-   | -43.2596- |
|                    |            |                | Art/Q/Zn              | 2.61000*   | .00775 | .000                    | 2.5936      | 2.6264    |
| TNF                | LSD        | Control group  | Acy                   | -58.28000* | .00700 | .000                    | -58.2948-   | -58.2652- |
|                    |            |                | Art/Q/Zn              | .67400*    | .00700 | .000                    | .6592       | .6888     |
|                    |            |                | Acy + Art/Q/Zn        | -6.27200*  | .00700 | .000                    | -6.2868-    | -6.2572-  |
|                    |            | Acy            | Control group         | 58.28000*  | .00700 | .000                    | 58.2652     | 58.2948   |
|                    |            |                | Art/Q/Zn              | 58.95400*  | .00700 | .000                    | 58.9392     | 58.9688   |
|                    |            |                | Acy + Art/Q/Zn        | 52.00800*  | .00700 | .000                    | 51.9932     | 52.0228   |
|                    |            | Art/Q/Zn       | Control group         | -.67400*   | .00700 | .000                    | -.6888-     | -.6592-   |
|                    |            |                | Acy                   | -58.95400* | .00700 | .000                    | -58.9688-   | -58.9392- |
|                    |            |                | Acy + Art/Q/Zn        | -6.94600*  | .00700 | .000                    | -6.9608-    | -6.9312-  |
|                    |            | Acy + Art/Q/Zn | Control group         | 6.27200*   | .00700 | .000                    | 6.2572      | 6.2868    |
|                    |            |                | Acy                   | -52.00800* | .00700 | .000                    | -52.0228-   | -51.9932- |
|                    |            |                | Art/Q/Zn              | 6.94600*   | .00700 | .000                    | 6.9312      | 6.9608    |
| CRP                | LSD        | Control group  | Acy                   | -93.86200* | .00600 | .000                    | -93.8747-   | -93.8493- |
|                    |            |                | Art/Q/Zn              | -2.00000*  | .00600 | .000                    | -2.0127-    | -1.9873-  |
|                    |            |                | Acy + Art/Q/Zn        | -4.27400*  | .00600 | .000                    | -4.2867-    | -4.2613-  |
|                    |            | Acy            | Control group         | 93.86200*  | .00600 | .000                    | 93.8493     | 93.8747   |
|                    |            |                | Art/Q/Zn              | 91.86200*  | .00600 | .000                    | 91.8493     | 91.8747   |
|                    |            |                | Acy + Art/Q/Zn        | 89.58800*  | .00600 | .000                    | 89.5753     | 89.6007   |
|                    |            | Art/Q/Zn       | Control group         | 2.00000*   | .00600 | .000                    | 1.9873      | 2.0127    |
|                    |            |                | Acy                   | -91.86200* | .00600 | .000                    | -91.8747-   | -91.8493- |
|                    |            |                | Acy + Art/Q/Zn        | -2.27400*  | .00600 | .000                    | -2.2867-    | -2.2613-  |
|                    |            | Acy + Art/Q/Zn | Control group         | 4.27400*   | .00600 | .000                    | 4.2613      | 4.2867    |
|                    |            |                | Acy                   | -89.58800* | .00600 | .000                    | -89.6007-   | -89.5753- |
|                    |            |                | Art/Q/Zn              | 2.27400*   | .00600 | .000                    | 2.2613      | 2.2867    |

\*. The mean difference is significant at the 0.05 level.

**Homogeneous Subsets**

ALT

| Groups                  | N | Subset for alpha = 0.05 |   |   |   |
|-------------------------|---|-------------------------|---|---|---|
|                         |   | 1                       | 2 | 3 | 4 |
| Tukey ... Control group | 5 | 13.1140                 |   |   |   |

Means for groups in homogeneous subsets are displayed.

a. Uses Harmonic Mean Sample Size = 5.000.

**ALT**

| Groups              |                | N | Subset for alpha = 0.05 |         |         |          |
|---------------------|----------------|---|-------------------------|---------|---------|----------|
|                     |                |   | 1                       | 2       | 3       | 4        |
| Tukey<br>Ba         | Art/Q/Zn       | 5 |                         | 13.2280 |         |          |
|                     | Acy + Art/Q/Zn | 5 |                         |         | 26.4480 |          |
|                     | Acy            | 5 |                         |         |         | 1.8489E2 |
| Duncan <sub>a</sub> | Control group  | 5 | 13.1140                 |         |         |          |
|                     | Art/Q/Zn       | 5 |                         | 13.2280 |         |          |
|                     | Acy + Art/Q/Zn | 5 |                         |         | 26.4480 |          |
|                     | Acy            | 5 |                         |         |         | 1.8489E2 |
|                     | Sig.           |   | 1.000                   | 1.000   | 1.000   | 1.000    |

Means for groups in homogeneous subsets are displayed.

a. Uses Harmonic Mean Sample Size = 5.000.

**AST**

| Groups              |                | N | Subset for alpha = 0.05 |         |         |          |
|---------------------|----------------|---|-------------------------|---------|---------|----------|
|                     |                |   | 1                       | 2       | 3       | 4        |
| Tukey<br>Ba         | Art/Q/Zn       | 5 | 14.0460                 |         |         |          |
|                     | Control group  | 5 |                         | 14.1160 |         |          |
|                     | Acy + Art/Q/Zn | 5 |                         |         | 24.0960 |          |
|                     | Acy            | 5 |                         |         |         | 2.9452E2 |
| Duncan <sub>a</sub> | Art/Q/Zn       | 5 | 14.0460                 |         |         |          |
|                     | Control group  | 5 |                         | 14.1160 |         |          |
|                     | Acy + Art/Q/Zn | 5 |                         |         | 24.0960 |          |
|                     | Acy            | 5 |                         |         |         | 2.9452E2 |
|                     | Sig.           |   | 1.000                   | 1.000   | 1.000   | 1.000    |

Means for groups in homogeneous subsets are displayed.

a. Uses Harmonic Mean Sample Size = 5.000.

**LDH**

| Groups              |                | N | Subset for alpha = 0.05 |          |          |          |
|---------------------|----------------|---|-------------------------|----------|----------|----------|
|                     |                |   | 1                       | 2        | 3        | 4        |
| Tukey<br>Ba         | Control group  | 5 | 1.4051E2                |          |          |          |
|                     | Art/Q/Zn       | 5 |                         | 1.4212E2 |          |          |
|                     | Acy + Art/Q/Zn | 5 |                         |          | 1.9878E2 |          |
|                     | Acy            | 5 |                         |          |          | 5.4541E2 |
| Duncan <sub>a</sub> | Control group  | 5 | 1.4051E2                |          |          |          |
|                     | Art/Q/Zn       | 5 |                         | 1.4212E2 |          |          |
|                     | Acy + Art/Q/Zn | 5 |                         |          | 1.9878E2 |          |
|                     | Acy            | 5 |                         |          |          | 5.4541E2 |
|                     | Sig.           |   | 1.000                   | 1.000    | 1.000    | 1.000    |

Means for groups in homogeneous subsets are displayed.

a. Uses Harmonic Mean Sample Size = 5.000.

**IL6**

| Groups      |                | N | Subset for alpha = 0.05 |        |        |         |
|-------------|----------------|---|-------------------------|--------|--------|---------|
|             |                |   | 1                       | 2      | 3      | 4       |
| Tukey<br>Ba | Control group  | 5 | 3.4080                  |        |        |         |
|             | Art/Q/Zn       | 5 |                         | 3.8160 |        |         |
|             | Acy + Art/Q/Zn | 5 |                         |        | 6.4260 |         |
|             | Acy            | 5 |                         |        |        | 49.7020 |
| Duncan a    | Control group  | 5 | 3.4080                  |        |        |         |
|             | Art/Q/Zn       | 5 |                         | 3.8160 |        |         |
|             | Acy + Art/Q/Zn | 5 |                         |        | 6.4260 |         |
|             | Acy            | 5 |                         |        |        | 49.7020 |
|             | Sig.           |   | 1.000                   | 1.000  | 1.000  | 1.000   |

Means for groups in homogeneous subsets are displayed.

a. Uses Harmonic Mean Sample Size = 5.000.

**TNF**

| Groups      |                | N | Subset for alpha = 0.05 |        |         |         |
|-------------|----------------|---|-------------------------|--------|---------|---------|
|             |                |   | 1                       | 2      | 3       | 4       |
| Tukey<br>Ba | Art/Q/Zn       | 5 | 3.8000                  |        |         |         |
|             | Control group  | 5 |                         | 4.4740 |         |         |
|             | Acy + Art/Q/Zn | 5 |                         |        | 10.7460 |         |
|             | Acy            | 5 |                         |        |         | 62.7540 |
| Duncan a    | Art/Q/Zn       | 5 | 3.8000                  |        |         |         |
|             | Control group  | 5 |                         | 4.4740 |         |         |
|             | Acy + Art/Q/Zn | 5 |                         |        | 10.7460 |         |
|             | Acy            | 5 |                         |        |         | 62.7540 |
|             | Sig.           |   | 1.000                   | 1.000  | 1.000   | 1.000   |

Means for groups in homogeneous subsets are displayed.

a. Uses Harmonic Mean Sample Size = 5.000.

**CRP**

| Groups      |                | N | Subset for alpha = 0.05 |        |        |         |
|-------------|----------------|---|-------------------------|--------|--------|---------|
|             |                |   | 1                       | 2      | 3      | 4       |
| Tukey<br>Ba | Control group  | 5 | 2.2340                  |        |        |         |
|             | Art/Q/Zn       | 5 |                         | 4.2340 |        |         |
|             | Acy + Art/Q/Zn | 5 |                         |        | 6.5080 |         |
|             | Acy            | 5 |                         |        |        | 96.0960 |
| Duncan a    | Control group  | 5 | 2.2340                  |        |        |         |
|             | Art/Q/Zn       | 5 |                         | 4.2340 |        |         |
|             | Acy + Art/Q/Zn | 5 |                         |        | 6.5080 |         |

Means for groups in homogeneous subsets are displayed.

a. Uses Harmonic Mean Sample Size = 5.000.



**CRP**

| Groups                             | N | Subset for alpha = 0.05 |       |       |                  |
|------------------------------------|---|-------------------------|-------|-------|------------------|
|                                    |   | 1                       | 2     | 3     | 4                |
| Duncan <sup>a</sup><br>Acy<br>Sig. | 5 | 1.000                   | 1.000 | 1.000 | 96.0960<br>1.000 |

Means for groups in homogeneous subsets are displayed.

a. Uses Harmonic Mean Sample Size = 5.000.
