# Supplementary material for: Chemical and spectroscopic characterization of (Artemisinin/Querctin/ Zinc) novel mixed ligand complex with assessment of its potent high antiviral activity against SARS-CoV-2 and antioxidant capacity against toxicity induced by acrylamide in male rats
Source: PeerJ journal article supplement (doi:10.7717/peerj.15638), 2024-01-02

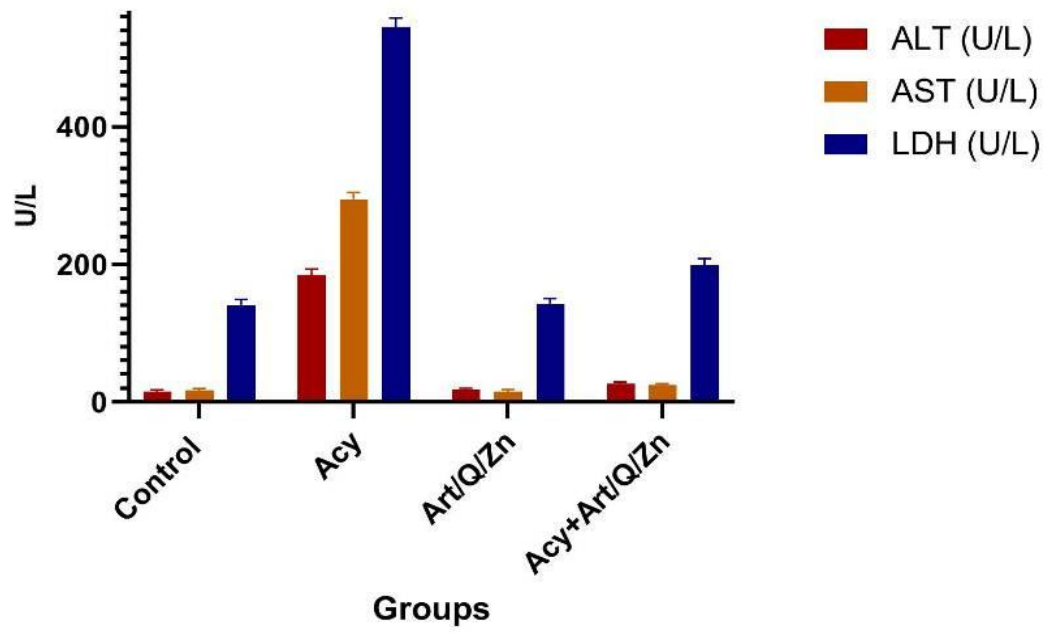

Supplement: S1.pdf [file S1.pdf]
