# Supplementary material for: Chemical and spectroscopic characterization of (Artemisinin/Querctin/ Zinc) novel mixed ligand complex with assessment of its potent high antiviral activity against SARS-CoV-2 and antioxidant capacity against toxicity induced by acrylamide in male rats
Source: PeerJ. 2024 Jan 2;12:e15638. doi: 10.7717/peerj.15638 (PMC10768679; doi:10.7717/peerj.15638)
Supplement: Supplemental Information 8 [file peerj-12-15638-s008.xls]

## Sheet: ورقة1
Transform of ART/Q/Zn			C					V
			A:1	A:2	A:3	A:4		B:1	B:2	B:3	B:4
			0.245	0.203	0.272	0.256
			0.303	0.291	0.314	0.334
			1.062	1.093	1.088	1.06
			1.776	1.751	1.722	1.715		1.88	1.866	1.867	1.859
			1.885	1.829	1.85	1.82		1.79	1.741	1.766	1.791
			1.888	1.887	1.862	1.83		1.76	1.738	1.751	1.765
			1.942	1.937	1.922	1.91		1.744	1.727	1.741	1.743
			1.951	1.938	1.949	1.932		1.732	1.709	1.718	1.722
			1.982	1.975	1.97	1.952		1.631	1.67	1.697	1.693
			2.053	2.054	1.985	1.96		1.628	1.601	1.655	1.611
			2.115	2.133	2.176	2.079		1.43	1.42	1.41	1.44
								1.962	1.951	1.982	1.97
Normalize of transform of ART/Q/Zn			C					V
			0.053	2.179	1.488	0.638
			3.135	2.498	3.72	4.783
			43.47	45.118	44.852	43.364
			81.414	80.085	78.544	78.172		84.065	81.478	81.663	80.185
			87.206	84.23	85.346	83.752		67.436	58.383	63.002	67.621
			87.365	87.312	85.984	84.283		61.894	57.829	60.231	62.818
			90.235	89.969	89.172	88.535		58.938	55.797	58.383	58.753
			90.713	90.023	90.607	89.704		56.721	52.471	54.134	54.873
			92.361	91.989	91.723	90.767		38.06	45.266	50.254	49.515
			96.134	96.187	92.52	91.192		37.506	32.517	42.494	34.365
			99.429	100.385	102.67	97.516		0.924	-0.924	-2.771	2.771
								99.215	97.182	102.91	100.693
Nonlin fit of Normalize of transform of ART/Q/Zn			C					V
Log(inhibitor) vs.normalized response --variable slope
Best fit value
Log IC50			2.319					1.006
Hillslope			-2.283					0.5526
IC50			208.5					10.14
Std. Error
Log IC50			0.0233					0.06956
Hillslope			0.2468					0.06435
95% CI (asymptotic)
Log IC50			2.272 to 2.366					0.8640 to 1.148
Hillslope			2.781 to 1.785					0.4212 to 0.6840
IC50			187.1 to 232.3					7.312 to 14.07
Goodness of Fit
Degree of freedom			42					30
R squared			0.9502					0.7953
Sum of Squares			2653					3416
Sy.x			7.947					10.67
Number of points
# of X values			44					44
# Y values analyzed			44					32
