# Supplementary material for: Chemical and spectroscopic characterization of (Artemisinin/Querctin/ Zinc) novel mixed ligand complex with assessment of its potent high antiviral activity against SARS-CoV-2 and antioxidant capacity against toxicity induced by acrylamide in male rats
Source: PeerJ. 2024 Jan 2;12:e15638. doi: 10.7717/peerj.15638 (PMC10768679; doi:10.7717/peerj.15638)
Supplement: Supplemental Information 9 [file peerj-12-15638-s009.xls]

## Sheet: ورقة1
Groups	ALT	AST	LDH	IL-6	TNF	CRP
Control group	13.02	14	140.75	2.98	4.2	2.76
Control group	13.14	15.65	135.65	3	4.47	2.22
Control group	12	14.15	136.43	3.02	4.3	2.09
Control group	13.14	12.87	137.54	4.32	5.34	1.98
Control group	13.14	14.16	140.46	3.43	4.01	2.24
Acy	184.91	295	545.4	49.7	60.43	93.87
Acy	185	294.5	545.41	49.64	62.77	95.87
Acy	184.87	297.87	540	48.23	61.98	96.08
Acy	186.78	294.52	520.54	49.09	62.75	90.87
Acy	184.87	299.65	514.53	51.43	64.54	91.76
Art/Q/Zn	13.25	14.05	142.13	3.82	3.1	4.2
Art/Q/Zn	13.21	15.98	142.12	3.7	3.76	4
Art/Q/Zn	13.65	16.09	144.34	4.98	3.98	3.98
Art/Q/Zn	14.87	13.76	145.43	3.02	3.3	3.9
Art/Q/Zn	14.23	14.06	142.32	3.8	3	4.24
Acy + Art/Q/Zn	26.44	24.32	148.86	6.32	10.43	6.21
Acy + Art/Q/Zn	28.54	26.54	198.65	6.44	10.01	6
Acy + Art/Q/Zn	30	25.43	190.34	6.1	10.74	7.03
Acy + Art/Q/Zn	27.65	23.34	193.54	6.42	11.43	6.98
Acy + Art/Q/Zn	26.46	24.1	190.43	6.75	12.54	6.5
